# Supplementary material for: Broad CTL response is required to clear latent HIV-1 due to dominance of escape mutations
Source: Springer Nature journal article supplement (doi:10.1038/nature14053), 2015-01-05
Supplement: 41586_2015_BFnature14053_MOESM514_ESM.pdf [file 41586_2015_BFnature14053_MOESM514_ESM.pdf]

**Supplementary Table 1: Deep sequencing results for viral variants archived in the latent reservoir.**

| Patient | HLA Type                                                         | Epitope Name | Epitope <sup>1</sup>       | Variant <sup>2</sup> | Variation Frequency (%) (PacBio) | Variation Frequency (%) (MiSeq) | Mutation Type <sup>3</sup> |
|---------|------------------------------------------------------------------|--------------|----------------------------|----------------------|----------------------------------|---------------------------------|----------------------------|
| CP05    | A*29:02<br>A*30:01<br>B*42:01<br>B*57:01<br>Cw*06:02<br>Cw*17:01 | RY11         | RSLYNTVATLY (A30)          | -                    | 0                                | 0                               | -                          |
|         |                                                                  | LY9          | LYNTVATLY (A29:02)         | -                    | 0                                | 0                               | -                          |
|         |                                                                  | IW9          | ISPRTLNAW (B57:01)         | I147L                | 89.4                             | 92.3                            | E                          |
|         |                                                                  | KF11         | KAFSPEVIPMF (B57:01)       | -                    | 0                                | 0                               | -                          |
|         |                                                                  | TL9          | TPQDLNTML (B42:01)         | Q182A                | 86.6                             | 88.1                            | MTND                       |
|         |                                                                  | TW10         | TSTLQEIQGW (B57:01)        | T242N                | 98.4                             | 98.7                            | E                          |
|         |                                                                  | QW9          | QASQEVKNW (B57:01)         | -                    | 0                                | 0                               | -                          |
| CP12    | A*01:01<br>A*29:02<br>B*44:03<br>B*57:01<br>Cw*06:02<br>Cw*16:01 | LY9          | LYNTVATLY (A29:02, B44:03) | T81A, V82I           | 67.1                             | 68.6                            | MTND                       |
|         |                                                                  | IW9          | ISPRTLNAW (B57:01)         | I147L                | 93                               | 97.3                            | E                          |
|         |                                                                  | KF11         | KAFSPEVIPMF (B57:01)       | -                    | 0                                | 0                               | -                          |
|         |                                                                  | TW10         | TSTLQEIQGW (B57:01)        | T242N                | 91.3                             | 99.1                            | E                          |
|         |                                                                  | QW9          | QASQEVKNW (B57:01)         | S310T                | 69.8                             | 72.8                            | MTND                       |
| CP18    | A*02:01<br>A*33:03<br>B*35:01<br>B*81:01<br>Cw*04:01<br>Cw*18:01 | WF9          | WASRELERF (B35:01)         | -                    | 0                                | 0                               | -                          |
|         |                                                                  | SL9          | SLYNTVATL (A02:01)         | Y79F, V82I, T84V     | 97.4                             | 98.8                            | E                          |
|         |                                                                  | TV9          | TLNAWVKVV (A02:01)         | -                    | 0                                | 0                               | -                          |
|         |                                                                  | TL9          | TPQDLNTML (B81:01)         | Q182G/A/V            | 87.6                             | 93.4                            | MTND                       |
|         |                                                                  | HA9          | HPVHAGPIA (B35:01)         | I223V                | 53.7                             | 66.6                            | MTND                       |
|         |                                                                  | PY9          | PIIPVGEIY (B35:01)         | -                    | 0                                | 0                               | -                          |
|         |                                                                  | FK10         | FLGKIWPSHK (A0201)         | -                    | 0                                | 0                               | -                          |
| CP19    | A*23:01<br>A*68:02<br>B*15:03<br>B*58:01<br>Cw*02:10<br>Cw*07:18 | RY11         | RSLYNTVATLY (B58)          | V82I, T84V           | 35.9                             | 24.6                            | MTND                       |
|         |                                                                  | VF9          | VKVVEEKAF (B15:03)         | -                    | 0                                | 0                               | -                          |
|         |                                                                  | GHL9         | GHQAAMQML (B15)            | -                    | 0                                | 0                               | -                          |
|         |                                                                  | TW10         | TSTLQEIQGW (B58:01)        | T242N, G248T         | 82.9                             | 98.3                            | E                          |
|         |                                                                  | QW9          | QASQEVKNW (B58:01)         | E312D                | 78.1                             | 97.9                            | MTND                       |
| CP31    | A*23:01<br>A*66:02<br>B*41:01<br>B*58:01<br>Cw*07:18<br>Cw*08:02 | RY11         | RSLYNTVATLY (B58)          | R76K, T81A           | 99.5                             | 92.3                            | E                          |
|         |                                                                  | KF11         | KAFSPEVIPMF (B58:01)       | -                    | 0                                | 0                               | -                          |
|         |                                                                  | TL9          | TPQDLNTML (C08:02)         | Q182G, T186L         | 0                                | 22.9                            | MTND                       |
|         |                                                                  | EW10         | ETINEEAAEW (B58)           | E203D                | 95.1                             | 69.2                            | SF                         |
|         |                                                                  | TW10         | TSTLQEIQGW (B58:01)        | T242N, G248A         | 99.1                             | 71.7                            | E                          |
|         |                                                                  | QW9          | QASQEVKNW (B58:01)         | E312D                | 99                               | 70.4                            | MTND                       |
| CP32    | A*34:02<br>A*68:01<br>B*44:03<br>B*53:01<br>Cw*04:01             | LY9          | LYNTVATLY (B44:03)         | -                    | 0                                | 0                               | -                          |
|         |                                                                  | TL9          | TPQDLNTML (B53:01)         | -                    | 0                                | 0                               | -                          |
|         |                                                                  | QW9          | QASQEVKNW (B53:01)         | S310T                | 97.2                             | 98.8                            | E                          |
|         |                                                                  |              |                            |                      |                                  |                                 |                            |
| CP36    | A*02:02<br>A*03:01<br>B*35:01<br>B*53:01<br>Cw*04:01             | KK9          | KIRLRPGGK (A03:01)         | -                    | 0                                | 0                               | -                          |
|         |                                                                  | RK9          | RLRPGGKKK (A03:01)         | K28S                 | 94.5                             | 97.5                            | MTND                       |
|         |                                                                  | WF9          | WASRELERF (B35:01)         | -                    | 0                                | 0                               | -                          |
|         |                                                                  | SL9          | SLYNTVATL (A02:02)         | T84V                 | 98.2                             | 99                              | E                          |
|         |                                                                  | TV9          | TLNAWVKVV (A02:02)         | V159I                | 81.6                             | 83.4                            | DR                         |
|         |                                                                  | EW10         | ETINEEAAEW (B53)           | -                    | 0                                | 0                               | -                          |
|         |                                                                  | HA9          | HPVHAGPIA (B35:01)         | -                    | 0                                | 0                               | -                          |
| QW9     | QASQEVKNW (B53:01)                                               | S310T        | 70.9                       | 78                   | MTND                             |                                 |                            |

| Patient  | HLA Type | Epitope Name        | Epitope <sup>1</sup>     | Variant <sup>2</sup>   | Variation Frequency (%) (PacBio) | Variation Frequency (%) (MiSeq) | Mutation Type <sup>3</sup> |
|----------|----------|---------------------|--------------------------|------------------------|----------------------------------|---------------------------------|----------------------------|
| CP38     | A*03:01  | KK9                 | KIRLRPGGK (A03:01)       | K26R                   | 10.4                             | 13.1                            | E                          |
|          | A*24:02  | RK9                 | RLRPGGKKK (A03:01)       | K26R, K28Q             | 75.4                             | 78.7                            | E                          |
|          | B*44:02  | KW9                 | KYKLVKLVV (A24:02)       | K28Q,K30R,I34L         | 98.3                             | 99.4                            | E                          |
|          | B*81:01  | TL9                 | TPQDLNTML (B81:01)       | Q182G/S, T186L         | 95.7                             | 99.4                            | MTND                       |
|          | Cw*05:01 | RL11                | RDYVDRFYKTL (B44:02)     | -                      | 0                                | 0                               | -                          |
|          | Cw*18:01 | AW11                | AEQASQEVKNW (B44:02,Cw5) | S310T                  | 12.5                             | 12.3                            | MTND                       |
| CP39     | A*03:01  | KK9                 | KIRLRPGGK (A03:01)       | -                      | 0                                | 0                               | -                          |
|          | A*03:01  | RK9                 | RLRPGGKKK (A03:01)       | K28Q                   | 94.7                             | 98.6                            | E                          |
|          | A*29:02  | LY9                 | LYNTVATLY (A29:02)       | Y79F, V82I, T84V, Y86F | 99                               | 98.6                            | E                          |
|          | B*07:02  | SV9                 | SPRTLNAWV (B07:02)       | -                      | 0                                | 0                               | -                          |
|          | B*15:16  | TV9                 | TLNAWVKVV (A02:01)       | -                      | 0                                | 0                               | -                          |
|          | Cw*07:02 | TL9                 | TPQDLNTML (B07:02)       | -                      | 0                                | 0                               | -                          |
| Cw*14:02 | HA9      | HPVHAGPIA (B7)      | -                        | 0                      | 0                                | -                               |                            |
|          | GL9      | GPGHKARVL (B07:02)  | -                        | 0                      | 0                                | -                               |                            |
| CP40     | A*02:02  | KK9                 | KIRLRPGGK (A03:01)       | K18R                   | 39.8                             | 40.4                            | MTND                       |
|          | A*03:01  | RK9                 | RLRPGGKKK (A03:01)       | K28T/R                 | 89.5                             | 91.1                            | DR                         |
|          | B*15:16  | RL10                | RPGGKKKYKL (B51:01)      | K28T/R, K30R           | 91.8                             | 92.4                            | MTND                       |
|          | B*51:01  | SL9                 | SLYNTVATL (A02:02, Cw14) | Y79F, T81A, V82I, T84V | 99.4                             | 99.3                            | E                          |
|          | Cw*14:02 | TV9                 | TLNAWVKVV (A02:02)       | V159I                  | 3.4                              | 4.2                             | DR                         |
| CP42     | A*02:01  | KK9                 | KIRLRPGGK (A03:01)       | -                      | 0                                | 0                               | -                          |
|          | A*02:01  | RK9                 | RLRPGGKKK (A03:01)       | K28Q                   | 97.5                             | 98.9                            | E                          |
|          | A*03:01  | SL9                 | SLYNTVATL (A02:01)       | Y79F, V82I             | 98.3                             | 98.7                            | E                          |
|          | B*07:02  | SV9                 | SPRTLNAWV (B07:02)       | -                      | 0                                | 0                               | -                          |
|          | B*38:01  | TV9                 | TLNAWVKVV (A02:01)       | -                      | 0                                | 0                               | -                          |
|          | Cw*07:02 | TL9                 | TPQDLNTML (B07:02)       | -                      | 0                                | 0                               | -                          |
|          | Cw*12:03 | HA9                 | HPVHAGPIA (B7)           | -                      | 0                                | 0                               | -                          |
|          |          | GL9                 | GPGHKARVL (B07:02)       | -                      | 0                                | 0                               | -                          |
|          | FK10     | FLGKIWPSHK (A02:01) | -                        | 0                      | 0                                | -                               |                            |
| CP47     | A*02:01  | SL9                 | SLYNTVATL (A02:01)       | Y79F,T81A,V82I,T84V    | 92.3                             | 96.4                            | E                          |
|          | A*25:01  | QW11                | QAISPRTLNAW (A25:01)     | I147L                  | 96.5                             | 96.5                            | DR                         |
|          | B*18:01  | TV9                 | TLNAWVKVV (A02:01)       | -                      | 0                                | 0                               | -                          |
|          | Cw*07:01 | EW10                | ETINEEAAEW (A25:01)      | -                      | 0                                | 0                               | -                          |
|          | Cw*12:03 | FRK10               | FRDYVDRFYK (B18:01)      | -                      | 0                                | 0                               | -                          |
|          |          | FK10                | FLGKIWPSHK (A02:01)      | -                      | 0                                | 0                               | -                          |
| CP48     | A*33:03  | LY9                 | LYNTVATLY (B44:03)       | T81A, V82I, T84V       | 94.2                             | 98.7                            | MTND                       |
|          | A*37:01  | RL11                | RDYVDRFYKTL (B44)        | -                      | 0                                | 0                               | -                          |
|          | B*44:03  | AW11                | AEQASQEVKNW (B44)        | S310T                  | 24.5                             | 27.8                            | MTND                       |
| CP49     | A*01:01  | GK9                 | GGKKKYKLV (B08:01)       | -                      | 0                                | 0                               | -                          |
|          | A*01:01  | EV9                 | ELRSYNTV (B08:01)        | R76K, Y79F             | 99.2                             | 98.5                            | MTND                       |
|          | A*02:01  | SL9                 | SLYNTVATL (A02:01)       | Y79F                   | 99.2                             | 98.5                            | E                          |
|          | B*08:01  | VQV9                | VQNLQGMV (B13)           | L138M                  | 97                               | 97.3                            | MTND                       |
|          | B*13:02  | TV9                 | TLNAWVKVV (A02:01)       | -                      | 0                                | 0                               | -                          |
|          | Cw*06:02 | GII1                | GQMREPRGSDI (B13)        | -                      | 0                                | 0                               | -                          |
|          | Cw*07:01 | EI8                 | EIYKRWII (B08:01)        | -                      | 0                                | 0                               | -                          |
|          |          | DL9                 | DCKTILKAL (B08:01)       | -                      | 0                                | 0                               | -                          |
|          |          | RI9                 | RQANFLGKI (B13)          | -                      | 0                                | 0                               | -                          |
|          | FK10     | FLGKIWPSHK (A02:01) | -                        | 0                      | 0                                | -                               |                            |
| CP50     | A*03:01  | KK9                 | KIRLRPGGK (A03:01)       | -                      | 0                                | 0                               | -                          |
|          | A*30:04  | RK9                 | RLRPGGKKK (A03:01)       | K28Q                   | 91.8                             | 94                              | E                          |
|          | B*35:01  | WF9                 | WASRELERF (B35:01)       | -                      | 0                                | 0                               | -                          |
|          | B*49:01  | RY11                | RSYNTVATLY (A30)         | R76K                   | 97.4                             | 98.5                            | IE                         |
|          | Cw*04:01 | HA9                 | HPVHAGPIA (B35:01)       | -                      | 0                                | 0                               | -                          |
|          | Cw*07:01 | PY9                 | PPIPVGEIY (B35:01)       | -                      | 0                                | 0                               | -                          |

| Patient and | HLA Type                                                         | Epitope Name | Epitope <sup>1</sup>     | Variant <sup>2</sup> | Variation Frequency (%) (PacBio) | Variation Frequency (%) (MiSeq) | Mutation Type <sup>3</sup> |
|-------------|------------------------------------------------------------------|--------------|--------------------------|----------------------|----------------------------------|---------------------------------|----------------------------|
| AP01        | A*02:01<br>A*03:01<br>B*35:01<br>B*44:02<br>Cw*04:01<br>Cw*05:01 | KK9          | KIRLRPGGK (A03:01)       | -                    | 0                                | 0                               | -                          |
|             |                                                                  | RK9          | RLRPGGKKK (A03:01)       | K28Q                 | 3.4                              | 4.3                             | E                          |
|             |                                                                  | WF9          | WASRELERF (B35:01)       | -                    | 0                                | 0                               | -                          |
|             |                                                                  | SL9          | SLYNTVATL (A02:01)       | T84V                 | 94.4                             | 98.7                            | E                          |
|             |                                                                  | TV9          | TLNAWVKVV (A02:01)       | -                    | 0                                | 0                               | -                          |
|             |                                                                  | HA9          | HPVHAGPIA (B35:01)       | I223P                | 95.2                             | 94.7                            | MTND                       |
|             |                                                                  | PY9          | PPIPVGIEY (B35:01)       | -                    | 0                                | 0                               | -                          |
|             |                                                                  | RL11         | RDYVDRFYKTL (B44:02)     | -                    | 0                                | 0                               | -                          |
|             |                                                                  | AW11         | AEQASQEVKNW (B44:02,Cw5) | N315G                | 96.5                             | 94.9                            | MTND                       |
| AP03        | A*24:02<br>A*24:07<br>B*15:02<br>B*27:05<br>Cw*01:02<br>Cw*03:03 | FK10         | FLGKIWPSHK (A02:01)      | -                    | 0                                | 0                               | -                          |
|             |                                                                  | IK9          | IRLRPGGKK (B27:05)       | K26N                 | 66.1                             | 61.5                            | MTND                       |
|             |                                                                  | KW9          | KYKCLKHIVW (A24:02)      | K28Q                 | 29.5                             | 36.4                            | E                          |
|             |                                                                  | VL8          | VIPMFSAL (C01:02)        | -                    | 0                                | 0                               | -                          |
|             |                                                                  | KK10         | KRWIILGLNK (B27:05)      | R264K, L268M         | 25                               | 25.8                            | E                          |
|             |                                                                  | YL9          | YVDRFYKTL (C03:03)       | -                    | 0                                | 0                               | -                          |
| AP04        | A*02:01<br>A*24:02<br>B*14:01<br>B*35:01<br>Cw*04:01<br>Cw*15:05 | KW9          | KYKCLKHIVW (A24:02)      | K30Q/R               | 50.4                             | 52.9                            | MTND                       |
|             |                                                                  | WF9          | WASRELERF (B35:01)       | F44Y                 | 7.7                              | 7                               | MTND                       |
|             |                                                                  | SL9          | SLYNTVATL (A02:01)       | V82I                 | 11.7                             | 12.3                            | E                          |
|             |                                                                  | TV9          | TLNAWVKVV (A02:01)       | V159I                | 7.6                              | 6.9                             | DR                         |
|             |                                                                  | HA9          | HPVHAGPIA (B35:01)       | -                    | 0                                | 0                               | -                          |
|             |                                                                  | PY9          | PPIPVGIEY (B35:01)       | -                    | 0                                | 0                               | -                          |
|             |                                                                  | CC9          | CRAPRKKGC (B14)          | K411R                | 70.5                             | 79.2                            | MTND                       |
|             |                                                                  | FK10         | FLGKIWPSHK (A02:01)      | I437L                | 7.7                              | 6.9                             | MTND                       |
| AP05        | A*02:01<br>B*07:02<br>B*51:01<br>Cw*01:02<br>Cw*07:02            | RL10         | RPGGKKKYKL (B51:01)      | K28Q                 | 95.8                             | 98.7                            | MTND                       |
|             |                                                                  | SL9          | SLYNTVATL (A02:01)       | -                    | 0                                | 0                               | -                          |
|             |                                                                  | SV9          | SPRTLNAWV (B07:02)       | -                    | 0                                | 0                               | -                          |
|             |                                                                  | TV9          | TLNAWVKVV (A02:01)       | V159I                | 99.2                             | 98.5                            | DR                         |
|             |                                                                  | VL8          | VIPMFSAL (Cw01:02)       | -                    | 0                                | 0                               | -                          |
|             |                                                                  | TL9          | TPQDLNMTL (B07:02)       | -                    | 0                                | 0                               | -                          |
|             |                                                                  | HA9          | HPVHAGPIA (B7)           | H219P, I223V         | 99.4                             | 98.7                            | MTND                       |
|             |                                                                  | GL9          | GPGHKARVL (B07:02)       | R361K                | 6.1                              | 18.3                            | MTND                       |
| AP07        | A*02:07<br>A*33:03<br>B*46:01<br>B*58:01<br>Cw*01:02<br>Cw*03:02 | FK10         | FLGKIWPSHK (A02:01)      | H441N                | 97.2                             | 98.1                            | MTND                       |
|             |                                                                  | RY11         | RSLYNTVATLY(B58)         | -                    | 0                                | 0                               | -                          |
|             |                                                                  | VL8          | VIPMFSAL(Cw01:02)        | S173T                | 96.6                             | 97.2                            | DR                         |
|             |                                                                  | TW10         | TSTLQEIQIGW(B58:01)      | -                    | 0                                | 0                               | -                          |
|             |                                                                  | YL9          | YVDRFYKTL(A02:07)        | -                    | 0                                | 0                               | -                          |
|             |                                                                  | QW9          | QASQEVKNW(B58)           | -                    | 0                                | 0                               | -                          |
| AP08        | A*02:01<br>A*03:01<br>B*07:02<br>Cw*07:02                        | KK9          | KIRLRPGGK (A03:01)       | -                    | 0                                | 0                               | -                          |
|             |                                                                  | RK9          | RLRPGGKKK (A03:01)       | R28Q                 | 96.1                             | 98.7                            | E                          |
|             |                                                                  | SL9          | SLYNTVATL (A02:01)       | -                    | 0                                | 0                               | -                          |
|             |                                                                  | SV9          | SPRTLNAWV (B07:02)       | -                    | 0                                | 0                               | -                          |
|             |                                                                  | TV9          | TLNAWVKVV (A02:01)       | -                    | 0                                | 0                               | -                          |
|             |                                                                  | TL9          | TPQDLNMTL (B07:02)       | Q182S                | 93.1                             | 96.5                            | MTND                       |
|             |                                                                  | HA9          | HPVHAGPIA (B7)           | -                    | 0                                | 0                               | -                          |
|             |                                                                  | GL9          | GPGHKARVL (B07:02)       | -                    | 0                                | 0                               | -                          |
| FK10        | FLGKIWPSHK (A02:01)                                              | -            | 0                        | 0                    | -                                |                                 |                            |

| Patient | HLA Type                                                   | Epitope Name | Epitope <sup>1</sup> | Variant <sup>2</sup> | Variation Frequency (%) (PacBio) | Variation Frequency (%) (MiSeq) | Mutation Type <sup>3</sup> |
|---------|------------------------------------------------------------|--------------|----------------------|----------------------|----------------------------------|---------------------------------|----------------------------|
| AP09    | A*03:01<br>A*11:01<br>B*08:01<br>B*14:02<br>Cw*07<br>Cw*08 | KK9          | KIRLRPGGK (A03:01)   | -                    | 0                                | 0                               | -                          |
|         |                                                            | RK9          | RLRPGGKKK (A03:01)   | -                    | 0                                | 0                               | -                          |
|         |                                                            | GK9          | GGKKKYKLK (B08:01)   | -                    | 0                                | 0                               | -                          |
|         |                                                            | EV9          | ELRSLYNTV (B08:01)   | R76K, V82I           | 98.9                             | 98.9                            | IE                         |
|         |                                                            | EI8          | EIYKRWII (B08:01)    | -                    | 0                                | 0                               | -                          |
|         |                                                            | DA9          | DRFYKTLRA(B14:02)    | -                    | 0                                | 0                               | -                          |
|         |                                                            | DL9          | DCKTILKAL (B08:01)   | -                    | 0                                | 0                               | -                          |
|         |                                                            | AK11         | ACQGVGGPGHK(A11:01)  | G357S                | 98                               | 99.1                            | SF                         |
|         |                                                            | CC9          | CRAPRKKGC (B14)      | -                    | 0                                | 0                               | -                          |
| AP10    | A*01:01<br>A*02:01<br>B*08:01<br>B*15:01<br>Cw*03<br>Cw*07 | GK9          | GGKKKYKLK (B08:01)   | -                    | 0                                | 0                               | -                          |
|         |                                                            | EV9          | ELRSLYNTV (B08:01)   | -                    | 0                                | 0                               | -                          |
|         |                                                            | SL9          | SLYNTVATL (A02:01)   | -                    | 0                                | 0                               | -                          |
|         |                                                            | TV9          | TLNAWVKVV (A02:01)   | -                    | 0                                | 0                               | -                          |
|         |                                                            | EI8          | EIYKRWII (B08:01)    | -                    | 0                                | 0                               | -                          |
|         |                                                            | GLY9         | GLNKIVRMY(B15:01)    | -                    | 0                                | 0                               | -                          |
|         |                                                            | DL9          | DCKTILKAL (B08:01)   | -                    | 0                                | 0                               | -                          |
|         |                                                            | FK10         | FLGKIWPSHK (A02:01)  | G435R                | 31.7                             | 51.6                            | MTND                       |
|         |                                                            | RL10         | RPGGKKKYKL (B51:01)  | -                    | 0                                | 0                               | -                          |
| AP11    | A*02:01<br>B*35:01<br>B*51:01<br>Cw*02:02<br>Cw*04:01      | WF9          | WASRELERF (B35:01)   | -                    | 0                                | 0                               | -                          |
|         |                                                            | SL9          | SLYNTVATL (A02:01)   | -                    | 0                                | 0                               | -                          |
|         |                                                            | TV9          | TLNAWVKVV (A02:01)   | -                    | 0                                | 0                               | -                          |
|         |                                                            | HA9          | HPVHAGPIA (B7)       | -                    | 0                                | 0                               | -                          |
|         |                                                            | PY9          | PPIPVGEIY (B35:01)   | -                    | 0                                | 0                               | -                          |
|         |                                                            | FK10         | FLGKIWPSHK (A02:01)  | G435R                | 2.1                              | 6.7                             | MTND                       |
|         |                                                            | RL10         | RPGGKKKYKL (B51:01)  | -                    | 0                                | 0                               | -                          |
| AP12    | A*01:01<br>A*03:01<br>B*07:02<br>Cw*07                     | KK9          | KIRLRPGGK (A03:01)   | -                    | 0                                | 0                               | -                          |
|         |                                                            | RK9          | RLRPGGKKK (A03:01)   | -                    | 0                                | 0                               | -                          |
|         |                                                            | SV9          | SPRTLNAWV (B07:02)   | R150K                | 2.7                              | 5.6                             | MTND                       |
|         |                                                            | TL9          | TPQDLNTML (B07:02)   | -                    | 0                                | 0                               | -                          |
|         |                                                            | HA9          | HPVHAGPIA (B7)       | -                    | 0                                | 0                               | -                          |
|         |                                                            | GL9          | GPGHKARVL (B07:02)   | -                    | 0                                | 0                               | -                          |
|         |                                                            | GL9          | GPGHKARVL (B07:02)   | -                    | 0                                | 0                               | -                          |

<sup>1</sup>Each patient's relevant optimal Gag epitopes are based on reported information in the HIV Molecular Immunology Database, Los Alamos National Laboratory (<http://www.hiv.lanl.gov/content/immunology/index.html>) according to the HLA type.

<sup>2</sup>Sequences from each subject were aligned to the reference HIV-1 clade B consensus Gag sequence. Variants were determined by the differences from the reference sequence.

<sup>3</sup>Mutation Type abbreviations: **MTND**: mutation type not determined; **E**: documented escape; **IE**: inferred escape; **DR**: diminished response; **SF**: susceptible form.
